# Supplementary material
Source: PubMed Central journal article supplement (PMC2997939)
Supplement: NIHMS231403-supplement-1.pdf [file NIHMS231403-supplement-1.pdf]

## **SUPPLEMENTARY INFORMATION**

### **Automated image analysis of neuroinflammation and neurodegeneration enables quantitative assessment of virus neurovirulence in primates**

Olga A. Maximova,\* Brian R. Murphy, and Alexander G. Pletnev \*

<sup>1</sup>Laboratory of Infectious Diseases, National Institute of Allergy and Infectious Diseases, National Institutes of Health, Bethesda, Maryland 20892

Olga A. Maximova (\*corresponding author):

Mailing address: Laboratory of Infectious Diseases, National Institute of Allergy and Infectious Diseases, National Institutes of Health, 33 North Drive, Bethesda, MD 20892

Phone: (301) 443-5953. Fax: (301) 480-4509. Email: [maximovao@niaid.nih.gov](mailto:maximovao@niaid.nih.gov)

Brian R. Murphy:

Mailing address: Laboratory of Infectious Diseases, National Institute of Allergy and Infectious Diseases, National Institutes of Health, 50 South drive, Bethesda, MD 20892

Phone: (301) 594-1616. Fax: (301) 480-5053. Email: [BMURPHY@niaid.nih.gov](mailto:BMURPHY@niaid.nih.gov)

Alexander G. Pletnev (\*co-corresponding author):

Laboratory of Infectious Diseases, National Institute of Allergy and Infectious Diseases, National Institutes of Health, 33 North Drive, Bethesda, MD 20892

Phone: (301) 402-7754. Fax: (301) 480-4509. Email: [apletnev@niaid.nih.gov](mailto:apletnev@niaid.nih.gov)

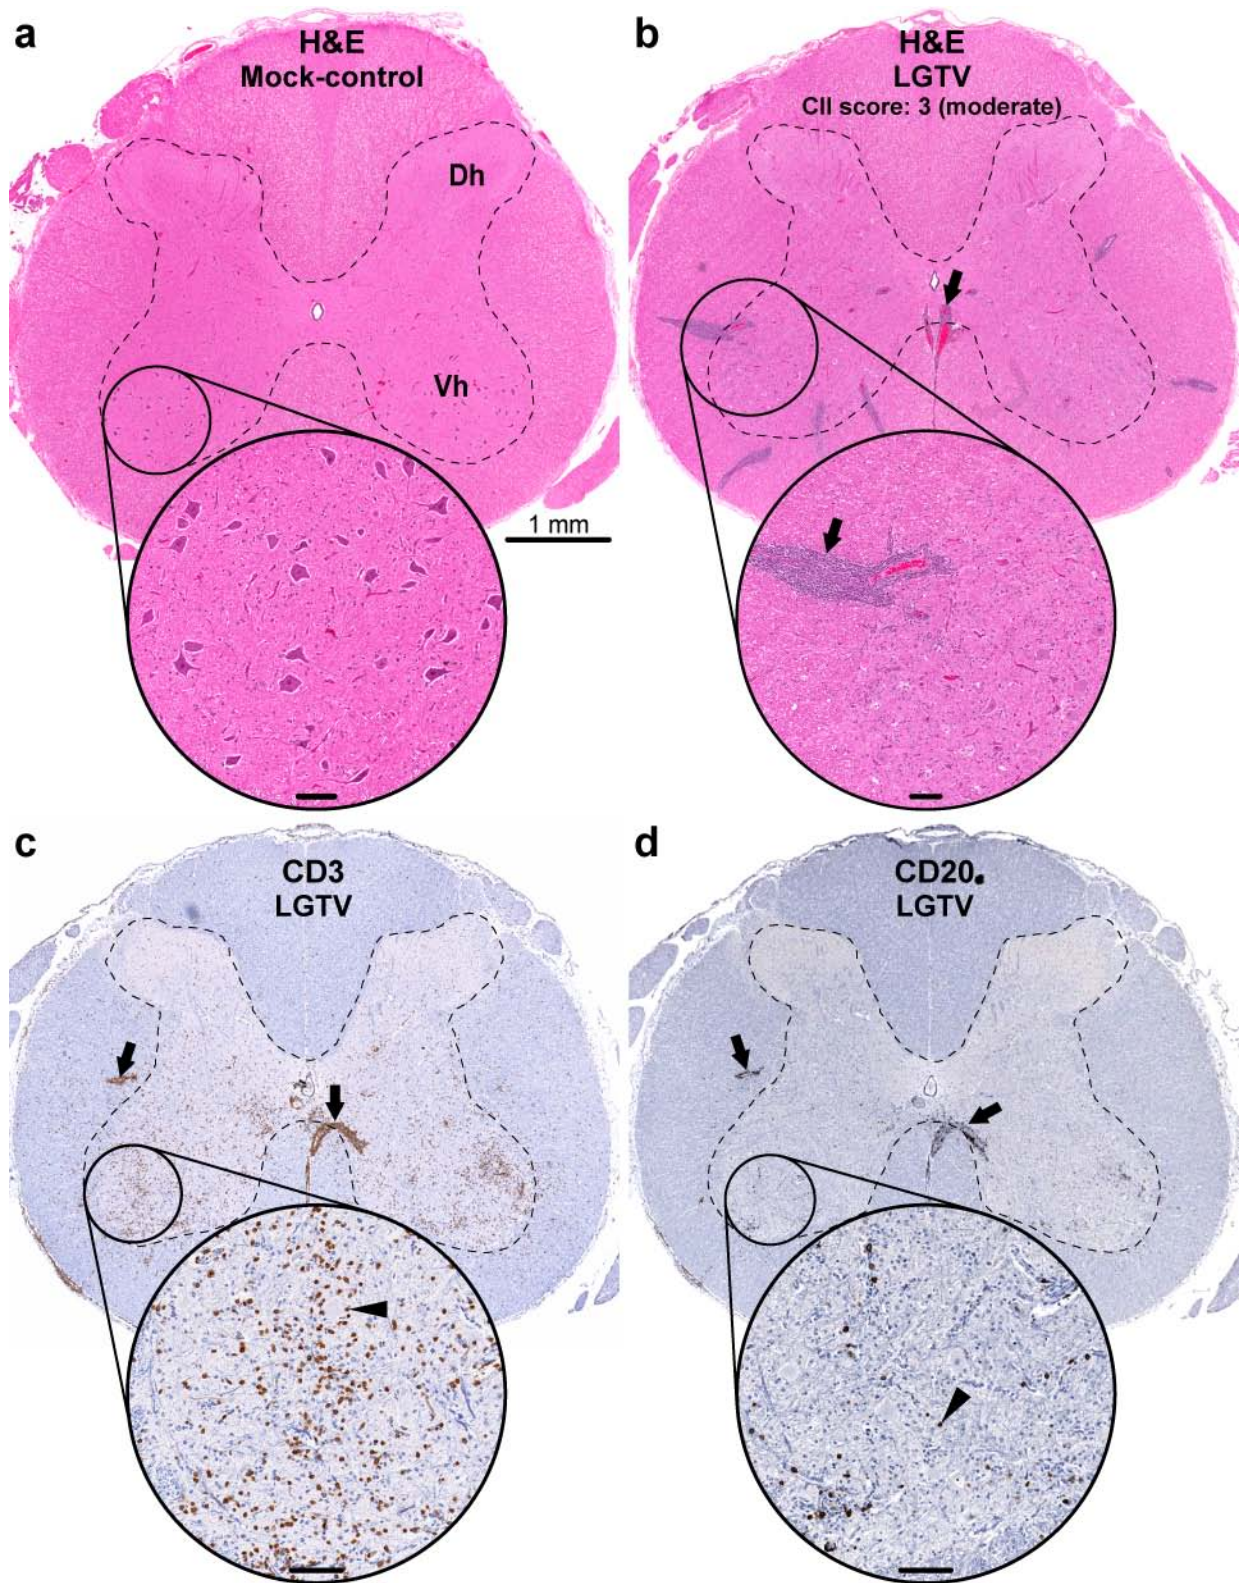

**Supplementary Figure 1. Assessment of cellular lymphocytic infiltration in the spinal cord.** Representative transverse sections of the lumbar spinal cord of a mock-inoculated monkey (**a**) or LGTV-infected monkey (**b – d**; adjacent sections) showing H&E staining (**a** and **b**), CD3-immunostaining (**c**), or CD20-immunostaining (**d**). The dashed lines show approximate boundaries of the grey matter. **Arrows** in **b – d**: large perivascular inflammatory infiltrates. The circled areas in **a – d** are shown at higher magnification in corresponding insets. Inset in **c** shows T-cell infiltration within the parenchyma of ventrolateral column containing motor neurons. Note: some T cells were seen in close contact with motor neurons (**arrowhead**). Inset in **d** shows intraparenchymal B-cell infiltration (**arrowhead**). Inset bars: 100  $\mu$ m.

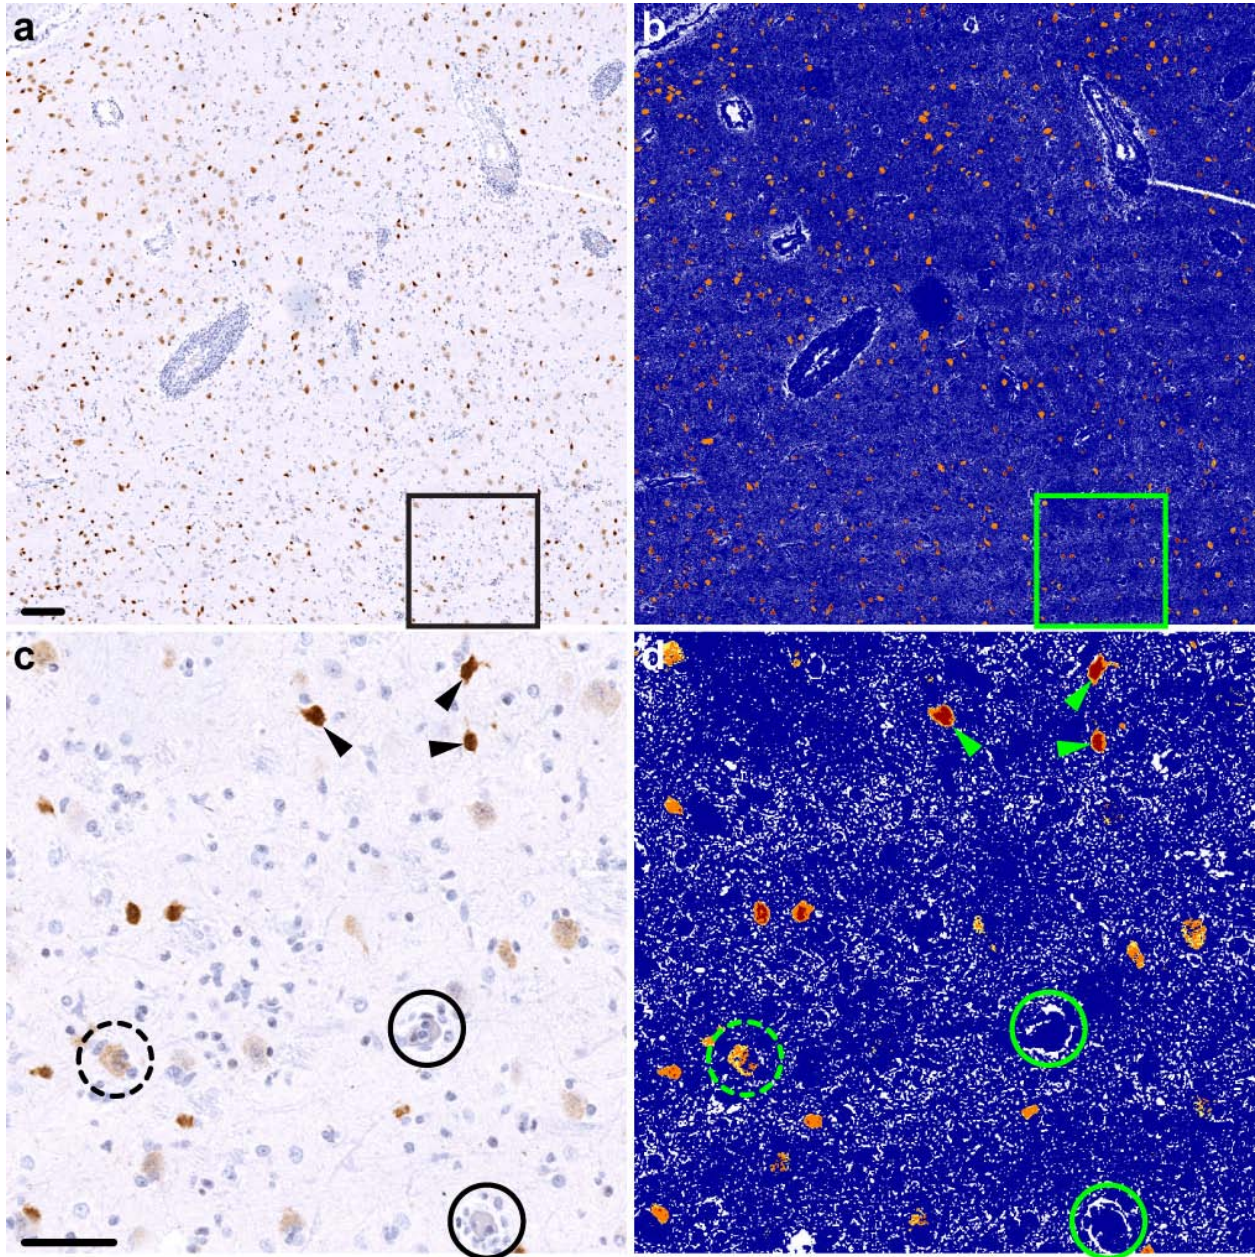

**Supplementary Figure 2. Image analysis of NeuN-immunoreactivity for assessment of neuronal degeneration in the thalamus.** (a) Original image showing the medial nucleus of pulvinar of a TBEV/DEN4 $\Delta$ 30-infected monkey. (b) Corresponding markup image showing the results of applied NeuN-IR algorithm (strong positive pixels - red; moderate positive pixels - orange; weak positive pixels - yellow; negative pixels - blue; neutral pixels - white). (c and d) Corresponding original and markup images of the boxed areas in a and b are shown at higher magnification. **Arrowheads (black in c or green in d):** strong NeuN-immunoreactivity in apparently normal neurons. **Note:** degenerating neurons show either significantly decreased NeuN-immunoreactivity (**dashed circles**) or completely devoid NeuN-immunoreactivity (**closed circles**). Bars: 50  $\mu$ m.

**Supplementary Table 1.** Grading scale used for evaluation of the cellular inflammatory infiltration and microglial activation/neuronal degeneration in the CNS

| <b>CNS region</b>         | <b>Score</b> | <b>Description</b>                                                                                                                           |
|---------------------------|--------------|----------------------------------------------------------------------------------------------------------------------------------------------|
| <b>CII</b>                |              |                                                                                                                                              |
| Basal ganglia<br>Thalamus | 0            | No inflammatory lesions                                                                                                                      |
| Spinal cord               | 1 (minimal)  | 1 to 3 perivascular cellular inflammatory infiltrates (perivascular cuffs) with or without focal inflammatory infiltration in leptomeninges  |
|                           | 2 (mild)     | 4 to 10 perivascular cuffs and mild diffuse inflammatory infiltration of the parenchyma, with or without focal infiltration in leptomeninges |
|                           | 3 (moderate) | 11 to 30 perivascular cuffs and diffuse inflammatory infiltration of the parenchyma, with or without focal infiltration in leptomeninges     |
|                           | 4 (severe)   | More than 30 perivascular cuffs and widespread diffuse infiltration of the parenchyma, usually with focal infiltration in leptomeninges      |
| <b>MGA/ND</b>             |              |                                                                                                                                              |
| Basal ganglia<br>Thalamus | 0            | No lesions other than injection-related lesions                                                                                              |
|                           | 1 (minimal)  | Up to 3 small microglial nodules (MGNs), no evidence of neuronal degeneration                                                                |
|                           | 2 (mild)     | 4 to 20 MGNs with degenerative neuronal changes within or on the periphery of MGN                                                            |
|                           | 3 (moderate) | 21 to 30 MGNs accompanied by diffuse microglial activation, neuronal degeneration, neuronophagia, and neuronal loss                          |
|                           | 4 (severe)   | More than 30 MGNs, diffuse microglial activation, neuronal degeneration, neuronophagia, and neuronal loss                                    |
| Spinal cord               | 0            | No lesions                                                                                                                                   |
|                           | 1 (minimal)  | Minimal diffuse microglial activation and mild neuronal degeneration                                                                         |
|                           | 2 (mild)     | 1 or 2 MGNs accompanied by diffuse microglial activation and neuronal degeneration                                                           |
|                           | 3 (moderate) | 3 to 6 MGNs accompanied by diffuse microglial activation, neuronal degeneration, neuronophagia, and neuronal loss                            |
|                           | 4 (severe)   | Multiple coalescent MGNs, neuronophagia, and severe neuronal loss                                                                            |

**Abbreviations:** CII - cellular inflammatory infiltration; MGA/ND - microglial activation/neuronal degeneration.
